# Supplementary material for: Repurposing FDA-approved drugs as therapeutics to treat Rift Valley fever virus infection
Source: Front Microbiol. 2015 Jul 8;6:676. doi: 10.3389/fmicb.2015.00676 (PMC4495339; doi:10.3389/fmicb.2015.00676)
Supplement: Supplementary file 1 [file Table1.XLSX]

## Sheet: Supplemental Table 1
Layout
Plate 1	Compound	Luminescence Signal	Fold Change	% Infection			DMSO			Stdev	%Stdev	Average	Fold Change	% Infection
A1	Reserpine	6743	0.12211	12.211			S90	52617	0.95285	0.134981	13.4981	55220.7	1	100
A2	Furosemide (Lasix)	18761	0.339746	33.9746			S90	63627	1.15223
A3	Cefdinir (Omnicef)	25816	0.467506	46.7506			S90	49418	0.894919
A4	Clotrimazole (Canesten)	20218	0.366131	36.6131
A5	Rizatriptan Benzoate (Maxalt)	40833	0.739451	73.9451
A6	Pyridostigmine Bromide (Mestinon)	27977	0.50664	50.664
A7	Methimazole (Tapazole, Northyx)	37776	0.684092	68.4092
A8	Metolazone (Zaroxolyn)	39341	0.712433	71.2433
A9	No drug control	37950	0.687243	68.7243
A10	Riluzole (Rilutek)	37237	0.674331	67.4331
A11	Risperidone (Risperdal)	36508	0.661129	66.1129
A12	Mock	427.667	0.00774469	0.774469
B1	Sulfameter (Bayrena)	37055	0.671035	67.1035
B2	Prilocaine	14796	0.267943	26.7943
B3	No drug control	39167	0.709282	70.9282
B4	Prednisone (Adasone)	40286	0.729546	72.9546
B5	Acetylcysteine	36550	0.66189	66.189
B6	Alendronate (Fosamax)	41131	0.744848	74.4848
B7	Ethinyl Estradiol	37718	0.683041	68.3041
B8	Nitazoxanide (Alinia, Annita)	14631	0.264955	26.4955
B9	Triamcinolone Acetonide	38621	0.699394	69.9394
B10	Orlistat (Alli, Xenical)	45522	0.824365	82.4365
B11	Allopurinol (Zyloprim)	42498	0.769603	76.9603
B12	Mock	427.667	0.00774469	0.774469
C1	Allopurinol Sodium (Aloprim)	49558	0.897454	89.7454
C2	No drug control	40576	0.734797	73.4797
C3	Erythromycin (E-Mycin)	43335	0.784761	78.4761
C4	Ibuprofen (Advil)	46732	0.846277	84.6277
C5	Albendazole (Albenza)	11411	0.206644	20.6644
C6	Chlorothiazide	52376	0.948485	94.8485
C7	Ursodiol (Actigal Urso)	54714	0.990825	99.0825
C8	Nitrofurazone (Nitrofural)	24524	0.444109	44.4109
C9	Ketoprofen (Actron)	44851	0.812214	81.2214
C10	Ketorolac (Toradol)	50835	0.920579	92.0579
C11	Adenosine (Adenocard)	43559	0.788817	78.8817
C12	Mock	427.667	0.00774469	0.774469
D1	Cytarabine	33220	0.601586	60.1586
D2	Zolmitriptan (Zomig)	40559	0.73449	73.449
D3	Telbivudine (Sebivo, Tyzeka)	41976	0.76015	76.015
D4	Monobenzone (Benoquin)	40899	0.740647	74.0647
D5	Tretinoin (Aberela)	48788	0.88351	88.351
D6	Phenylbutazone (Butazolidin, Butatron)	52526	0.951202	95.1202
D7	Ezetimibe (Zetia)	50694	0.918026	91.8026
D8	Enalaprilat dihydrate	43650	0.790465	79.0465
D9	Estrone	46401	0.840283	84.0283
D10	Flucytosine (Ancobon)	43633	0.790157	79.0157
D11	No drug control	42208	0.764352	76.4352
D12	DMSO	55220.7	1	100
E1	Loteprednol etabonate	25534	0.462399	46.2399
E2	Aminocaproic acid (Amicar)	44304	0.802308	80.2308
E3	Aminophylline (Truphylline)	40998	0.742439	74.2439
E4	Amorolfine Hydrochloride	59199	1.07204	107.204
E5	Chloramphenicol (Chloromycetin)	40452	0.732552	73.2552
E6	No drug control	47022	0.851529	85.1529
E7	Flurbiprofen (Ansaid)	44785	0.811019	81.1019
E8	Disulfiram (Antabuse)	47387	0.858139	85.8139
E9	Mesalamine (Lialda)	44304	0.802308	80.2308
E10	Ipratropium bromide	51042	0.924328	92.4328
E11	Sulfanilamide	43874	0.794521	79.4521
E12	DMSO	55220.7	1	100
F1	Betamethasone Dipropionate (Diprolene)	55957	1.01333	101.333
F2	Betapar (Meprednisone)	55982	1.01379	101.379
F3	Betamethasone valerate (Betnovate)	55999	1.01409	101.409
F4	No drug control	53205	0.963498	96.3498
F5	Busulfan (Myleran, Busulfex)	45755	0.828585	82.8585
F6	Carbamazepine (Carbatrol)	48779	0.883347	88.3347
F7	Hydrocortisone (Cortisol)	49451	0.895516	89.5516
F8	Torsemide (Demadex)	51987	0.941441	94.1441
F9	No drug control	51017	0.923875	92.3875
F10	Desonide	47254	0.85573	85.573
F11	Didanosine (Videx)	43832	0.793761	79.3761
F12	DMSO	55220.7	1	100
G1	Divalproex sodium	58950	1.06754	106.754
G2	Emtricitabine (Emtriva)	49161	0.890265	89.0265
G3	Progesterone (Prometrium)	50014	0.905712	90.5712
G4	Lamivudine (Epivir)	56463	1.0225	102.25
G5	Eplerenone	46442	0.841026	84.1026
G6	Hydrochlorothiazide	55535	1.00569	100.569
G7	Estradiol	54208	0.981661	98.1661
G8	No drug control	48531	0.878856	87.8856
G9	Piroxicam (Feldene)	55427	1.00374	100.374
G10	Glipizide (Glucotrol)	52327	0.947598	94.7598
G11	Glyburide (Diabeta)	55667	1.00808	100.808
G12	Curcumin	31116	0.563485	56.3485
H1	Adefovir Dipivoxil (Preveon, Hepsera)	18861	0.341557	34.1557
H2	Zalcitabine	38803	0.70269	70.269
H3	Indomethacin (Indocid, Indocin)	64564	1.1692	116.92
H4	Paliperidone (Invega)	56082	1.0156	101.56
H5	Terbinafine (Lamisil, Terbinex)	45746	0.828422	82.8422
H6	Levodopa (Sinemet)	51448	0.93168	93.168
H7	Levonorgestrel (Levonelle)	58071	1.05162	105.162
H8	Gemfibrozil (Lopid)	55294	1.00133	100.133
H9	Indapamide (Lozol)	36641	0.663538	66.3538
H10	No drug control	26975	0.488495	48.8495
H11	No drug control	44188	0.800208	80.0208
H12	Curcumin	31116	0.563485	56.3485
Layout
Plate 2	Compound	Luminescence signal	Fold Change	% Infection			DMSO			Stdev	%Stdev	Average	Fold Change	% Infection
A1	Methylprednisolone	21477	0.38893	38.893			S90	52617	0.95285	0.134981	13.4981	55220.7	1	100
A2	Mesna (Uromitexan, Mesnex)	30528	0.552836	55.2836			S90	63627	1.15223
A3	Methocarbamol (Robaxin)	41752	0.756094	75.6094			S90	49418	0.894919
A4	Prednisolone (Hydroretrocortine)	41031	0.743037	74.3037
A5	Telmisartan (Micardis)	51291	0.928837	92.8837
A6	No drug control	46086	0.834579	83.4579
A7	Guaifenesin (Guaiphenesin)	36309	0.657526	65.7526
A8	Rifabutin (Mycobutin)	37742	0.683476	68.3476
A9	Nevirapine (Viramune)	45556	0.824981	82.4981
A10	Niacin (Nicotinic acid)	41860	0.75805	75.805
A11	Nimodipine (Nimotop)	37767	0.683929	68.3929
A12	Mock	358.333	0.00648911	0.648911
B1	Nisoldipine (Sular)	36699	0.664588	66.4588
B2	L-Glutamine	38836	0.703287	70.3287
B3	No drug control	40468	0.732842	73.2842
B4	Gadodiamide (Omniscan)	42266	0.765402	76.5402
B5	No drug control	42672	0.772754	77.2754
B6	Oxybutynin (Ditropan)	33253	0.602184	60.2184
B7	Pitavastatin calcium (Livalo)	5047	0.0913969	9.13969
B8	Rifapentine (Priftin)	34404	0.623028	62.3028
B9	Pyrazinamide (Pyrazinoic acid amide)	38546	0.698036	69.8036
B10	Quetiapine fumarate (Seroquel)	27240	0.493294	49.3294
B11	No drug control	34412	0.623172	62.3172
B12	Mock	358.333	0.00648911	0.648911
C1	Cefditoren pivoxil	47370	0.857831	85.7831
C2	Sulfadiazine	39805	0.720835	72.0835
C3	Chlorprothixene	22859	0.413957	41.3957
C4	Oxytetracycline (Terramycin)	36657	0.663828	66.3828
C5	Thioguanine	34164	0.618681	61.8681
C6	Toremifene Citrate (Fareston, Acapodene)	14564	0.263742	26.3742
C7	Ethionamide	26776	0.484891	48.4891
C8	Trifluridine (Viroptic)	32358	0.585976	58.5976
C9	Vidarabine (Vira-A)	33104	0.599486	59.9486
C10	Teniposide (Vumon)	22106	0.400321	40.0321
C11	No drug control	32458	0.587787	58.7787
C12	Mock	358.333	0.00648911	0.648911
D1	Rifaximin (Xifaxan)	35299	0.639235	63.9235
D2	Simvastatin (Zocor)	6065	0.109832	10.9832
D3	Ramipril (Altace)	40137	0.726847	72.6847
D4	Fenofibrate (Tricor, Trilipix)	37469	0.678532	67.8532
D5	Ranolazine (Ranexa)	38099	0.689941	68.9941
D6	Ranitidine (Zantac)	43467	0.787151	78.7151
D7	Acadesine	30519	0.552674	55.2674
D8	No drug control	35009	0.633984	63.3984
D9	Acipimox	42821	0.775452	77.5452
D10	Acyclovir (Aciclovir)	34296	0.621072	62.1072
D11	Amiloride hydrochloride (Midamor)	35804	0.64838	64.838
D12	DMSO	37543.7	0.679884	67.9884
E1	Amlodipine besylate (Norvasc)	36293	0.657236	65.7236
E2	Clofibrate (Atromid-S)	41263	0.747238	74.7238
E3	Chloroxine	31414	0.568881	56.8881
E4	Lomustine (CeeNU)	44213	0.80066	80.066
E5	Chenodeoxycholic acid	38712	0.701042	70.1042
E6	Cimetidine (Tagamet)	42896	0.776811	77.6811
E7	Clemastine Fumarate	19722	0.357149	35.7149
E8	Daidzein	33336	0.603687	60.3687
E9	No drug control	37237	0.674331	67.4331
E10	Diphenhydramine HCl (Benadryl)	38165	0.691136	69.1136
E11	Dapoxetine hydrochloride (Priligy)	24838	0.449795	44.9795
E12	DMSO	37543.7	0.679884	67.9884
F1	No drug control	46500	0.842076	84.2076
F2	Felodipine (Plendil)	37221	0.674041	67.4041
F3	Deflazacort (Calcort)	40062	0.725489	72.5489
F4	Nizatidine	43542	0.788509	78.8509
F5	Carbidopa	38770	0.702092	70.2092
F6	Valsartan (Diovan)	39606	0.717231	71.7231
F7	Dipyridamole (Persantine)	28167	0.510081	51.0081
F8	Hydroxyurea (Cytodrox)	32954	0.596769	59.6769
F9	Potassium iodide	37336	0.676124	67.6124
F10	Tropisetron	28706	0.519842	51.9842
F11	Nicotinamide (Niacinamide)	38347	0.694432	69.4432
F12	DMSO	37543.7	0.679884	67.9884
G1	No drug control	35763	0.647638	64.7638
G2	Vitamin B12	11469	0.207694	20.7694
G3	Diclofenac	41222	0.746496	74.6496
G4	No drug control	41645	0.754156	75.4156
G5	Fluvastatin sodium (Lescol)	7356	0.133211	13.3211
G6	Sulfamethoxazole	32151	0.582228	58.2228
G7	Sulfisoxazole	32756	0.593184	59.3184
G8	Crystal violet	24193	0.438115	43.8115
G9	Haloperidol (Haldol)	34437	0.623625	62.3625
G10	No drug control	30611	0.55434	55.434
G11	Triamcinolone (Aristocort)	33998	0.615675	61.5675
G12	Curcumin	20852	0.377612	37.7612
H1	Nystatin (Mycostatin)	19738	0.357439	35.7439
H2	Isoniazid (Tubizid)	28333	0.513087	51.3087
H3	Levamisole Hydrochloride (Ergamisol)	30213	0.547132	54.7132
H4	Levofloxacin (Levaquin)	32010	0.579674	57.9674
H5	Enalapril maleate (Vasotec)	42357	0.76705	76.705
H6	No drug control	41181	0.745753	74.5753
H7	Metformin hydrochloride (Glucophage)	43542	0.788509	78.8509
H8	Methoxsalen (Oxsoralen)	27248	0.493438	49.3438
H9	Miconazole nitrate	31016	0.561674	56.1674
H10	Primidone (Mysoline)	40394	0.731501	73.1501
H11	Nefiracetam (Translon)	35721	0.646877	64.6877
H12	Curcumin	20852	0.377612	37.7612
Layout
Plate 3	Compound	Luminescence signal	Fold Change	% Infection			DMSO			Stdev	%Stdev	Average	Fold Change	% Infection
A1	Nicorandil (Ikorel)	99	0.00179281	0.179281			D12	9921	0.179661	0.0694533	6.94533	10917	1	100
A2	Tamoxifen Citrate (Nolvadex)	893	0.0161715	1.61715			E12	15152	0.27439
A3	No drug control	5320	0.0963407	9.63407			F12	7678	0.139042
A4	Sodium butyrate	5403	0.0978438	9.78438
A5	Sodium orthovanadate	8283	0.149998	14.9998
A6	Elvitegravir (GS-9137)	5543	0.100379	10.0379
A7	Maraviroc	7794	0.141143	14.1143
A8	Vicriviroc Malate	6843	0.123921	12.3921
A9	Raltegravir (MK-0518)	8283	0.149998	14.9998
A10	Pyrimethamine	9764	0.176818	17.6818
A11	Sulindac (Clinoril)	4675	0.0846603	8.46603
A12	Mock	10136	0.183554	18.3554
B1	Taurine	5254	0.0951455	9.51455
B2	Pramipexole dihydrochloride monohydrate	7248	0.131255	13.1255
B3	No drug control	9780	0.177108	17.7108
B4	No drug control	11063	0.200342	20.0342
B5	Dextrose (D-glucose)	15450	0.279787	27.9787
B6	No drug control	16675	0.30197	30.197
B7	Mestranol	14829	0.268541	26.8541
B8	Naftopidil (Flivas)	12586	0.227922	22.7922
B9	S-(+)-Rolipram	9052	0.163924	16.3924
B10	No drug control	18529	0.335545	33.5545
B11	Fudosteine	13811	0.250106	25.0106
B12	Mock	10136	0.183554	18.3554
C1	Atropine	4675	0.0846603	8.46603
C2	Gabapentin (Neurontin)	12570	0.227632	22.7632
C3	Amantadine hydrochloride (Symmetrel)	20218	0.366131	36.6131
C4	Amfebutamone (Bupropion)	15541	0.281434	28.1434
C5	Benserazide	21435	0.38817	38.817
C6	Bupivacaine hydrochloride (Marcain)	16236	0.29402	29.402
C7	Bethanechol chloride	21965	0.397768	39.7768
C8	Chlorpromazine (Sonazine)	16112	0.291775	29.1775
C9	Clindamycin hydrochloride (Dalacin)	13637	0.246955	24.6955
C10	Clonidine hydrochloride (Catapres)	17859	0.323412	32.3412
C11	Clozapine (Clozaril)	14564	0.263742	26.3742
C12	Mock	10136	0.183554	18.3554
D1	Domperidone (Motilium)	9143	0.165572	16.5572
D2	Donepezil HCl (Aricept)	18852	0.341394	34.1394
D3	No drug control	17818	0.322669	32.2669
D4	No drug control	24002	0.434656	43.4656
D5	Fenbendazole (Panacur)	5345	0.0967935	9.67935
D6	Fleroxacin (Quinodis)	19498	0.353092	35.3092
D7	Gallamine triethiodide (Flaxedil)	21212	0.384132	38.4132
D8	Imatinib (Gleevec)	26122	0.473048	47.3048
D9	Lincomycin hydrochloride (Lincocin)	16890	0.305864	30.5864
D10	Loperamide hydrochloride	9830	0.178013	17.8013
D11	Manidipine (Manyper)	6992	0.126619	12.6619
D12	DMSO	10917	0.197698	19.7698
E1	Manidipine dihydrochloride (CV-4093)	3293	0.0596335	5.96335
E2	Milrinone (Primacor)	14846	0.268849	26.8849
E3	Mitoxantrone Hydrochloride	6983	0.126456	12.6456
E4	Moroxydine	23116	0.418611	41.8611
E5	Mycophenolic (Mycophenolate)	5618	0.101737	10.1737
E6	No drug control	23745	0.430002	43.0002
E7	Nateglinide (Starlix)	27546	0.498835	49.8835
E8	Neostigmine bromide (Prostigmin)	23365	0.423121	42.3121
E9	Novobiocin sodium (Albamycin)	24665	0.446662	44.6662
E10	Olopatadine hydrochloride (Opatanol)	14780	0.267653	26.7653
E11	Oxymetazoline hydrochloride	11353	0.205593	20.5593
E12	DMSO	10917	0.197698	19.7698
F1	Ozagrel	8920	0.161534	16.1534
F2	Pancuronium (Pavulon)	21303	0.385779	38.5779
F3	No drug control	24756	0.44831	44.831
F4	Quinine hydrochloride dihydrate	25360	0.459248	45.9248
F5	Racecadotril (Acetorphan)	29227	0.529276	52.9276
F6	No drug control	22222	0.402422	40.2422
F7	Rosiglitazone maleate	31091	0.563032	56.3032
F8	Salbutamol sulfate (Albuterol)	17577	0.318305	31.8305
F9	Sotalol (Betapace)	32035	0.580127	58.0127
F10	Spectinomycin hydrochloride	19159	0.346953	34.6953
F11	No drug control	12594	0.228067	22.8067
F12	DMSO	10917	0.197698	19.7698
G1	Terbinafine hydrochloride (Lamisil)	4716	0.0854028	8.54028
G2	Vardenafil (Vivanza)	12081	0.218777	21.8777
G3	No drug control	20400	0.369427	36.9427
G4	Axitinib	18687	0.338406	33.8406
G5	Bortezomib (Velcade)	678	0.012278	1.2278
G6	Dasatinib (BMS-354825)	2639	0.0477901	4.77901
G7	Erlotinib HCl	7447	0.134859	13.4859
G8	Gefitinib (Iressa)	12404	0.224626	22.4626
G9	Imatinib Mesylate	22487	0.407221	40.7221
G10	Lapatinib Ditosylate (Tykerb)	6992	0.126619	12.6619
G11	Lenalidomide	14142	0.2561	25.61
G12	Curcumin	3168.5	0.0573789	5.73789
H1	Nilotinib (AMN-107)	58	0.00105033	0.105033
H2	Pazopanib HCl	2912	0.0527339	5.27339
H3	Rapamycin (Sirolimus)	4666	0.0844974	8.44974
H4	Sorafenib (Nexavar)	1191	0.021568	2.1568
H5	Sunitinib Malate (Sutent)	199	0.00360372	0.360372
H6	Temsirolimus (Torisel)	5891	0.106681	10.6681
H7	Vandetanib (Zactima)	1233	0.0223286	2.23286
H8	Vorinostat (SAHA)	13778	0.249508	24.9508
H9	Masitinib (AB1010)	4277	0.0774529	7.74529
H10	Abiraterone (CB-7598)	4923	0.0891514	8.91514
H11	Pemetrexed	5146	0.0931897	9.31897
H12	Curcumin	3168.5	0.0573789	5.73789
Layout
Plate 4	Compound	Luminescence signal	Fold Change	% Infection			DMSO			Stdev	%Stdev	Average	Fold Change
A1	Docetaxel (Taxotere)	3541	0.0641245	6.41245			D12	21071	0.381578	0.0302931	3.02931	21476.7	1
A2	Gemcitabine HCl (Gemzar)	4443	0.080459	8.0459			E12	23315	0.422215
A3	Paclitaxel (Taxol)	6437	0.116569	11.6569			F12	20044	0.36298
A4	Capecitabine (Xeloda)	16402	0.297026	29.7026
A5	Cisplatin	18844	0.341249	34.1249
A6	No drug control	19192	0.347551	34.7551
A7	Ritonavir	17246	0.312311	31.2311
A8	Anastrozole	18364	0.332557	33.2557
A9	Aprepitant (MK-0869)	11220	0.203185	20.3185
A10	Bicalutamide (Casodex)	15268	0.276491	27.6491
A11	Fulvestrant (Faslodex)	8473	0.153439	15.3439
A12	Mock	20773.3	0.376188	37.6188
B1	Thalidomide	8663	0.15688	15.688
B2	Exemestane	16021	0.290127	29.0127
B3	Finasteride	21725	0.393422	39.3422
B4	Irinotecan	22048	0.399271	39.9271
B5	Cladribine	16808	0.304379	30.4379
B6	Decitabine	26288	0.476054	47.6054
B7	Dutasteride	21394	0.387427	38.7427
B8	Bisoprolol	25526	0.462254	46.2254
B9	Doxorubicin (Adriamycin)	16087	0.291322	29.1322
B10	Adrucil (Fluorouracil)	16882	0.305719	30.5719
B11	Imiquimod	22023	0.398818	39.8818
B12	Mock	20773.3	0.376188	37.6188
C1	Bendamustine HCL	16394	0.296882	29.6882
C2	Nelarabine (Arranon)	21791	0.394617	39.4617
C3	Bleomycin sulfate	10923	0.197806	19.7806
C4	Carboplatin	25700	0.465405	46.5405
C5	No drug control	27604	0.499885	49.9885
C6	Clofarabine	10889	0.197191	19.7191
C7	Dacarbazine (DTIC-Dome)	30279	0.548327	54.8327
C8	Dexrazoxane Hydrochloride	25087	0.454305	45.4305
C9	Epirubicin Hydrochloride	12354	0.223721	22.3721
C10	Oxaliplatin (Eloxatin)	22065	0.399579	39.9579
C11	Etoposide (VP-16) Etoposide	23505	0.425656	42.5656
C12	Mock	20773.3	0.376188	37.6188
D1	Evista (Raloxifene Hydrochloride)	14912	0.270044	27.0044
D2	Idarubicin HCl	695	0.0125859	1.25859
D3	Fludarabine Phosphate (Fludara)	27298	0.494344	49.4344
D4	Topotecan HCl	16559	0.29987	29.987
D5	2-Methoxyestradiol	13381	0.242319	24.2319
D6	Letrozole	29658	0.537082	53.7082
D7	Leucovorin Calcium	38264	0.692929	69.2929
D8	Methazolastone	25816	0.467506	46.7506
D9	Vincristine	3731	0.0675653	6.75653
D10	Agomelatine	23911	0.433008	43.3008
D11	Leflunomide	23174	0.419662	41.9662
D12	DMSO	21476.7	0.388924	38.8924
E1	Entecavir hydrate	21369	0.386975	38.6975
E2	No drug control	24590	0.445304	44.5304
E3	Nepafenac	27472	0.497495	49.7495
E4	Rufinamide (Banzel)	28639	0.518628	51.8628
E5	Posaconazole	22346	0.404667	40.4667
E6	Prasugrel (Effient)	33476	0.606222	60.6222
E7	Ramelteon (TAK-375)	28109	0.50903	50.903
E8	AMG-073 HCl (Cinacalcet hydrochloride)	27811	0.503634	50.3634
E9	Celecoxib	23530	0.426109	42.6109
E10	Acarbose	26826	0.485796	48.5796
E11	Adapalene	19821	0.358942	35.8942
E12	DMSO	21476.7	0.388924	38.8924
F1	Altretamine (Hexalen)	19531	0.35369	35.369
F2	Asenapine	17809	0.322506	32.2506
F3	Benazepril hydrochloride	25410	0.460154	46.0154
F4	Budesonide	21493	0.38922	38.922
F5	Bumetanide	23108	0.418467	41.8467
F6	Camptothecin	5494	0.0994917	9.94917
F7	Cetirizine Dihydrochloride	27621	0.500193	50.0193
F8	Cilnidipine	18265	0.330764	33.0764
F9	Cilostazol	28863	0.522685	52.2685
F10	Floxuridine	4451	0.0806039	8.06039
F11	Ifosfamide	23638	0.428064	42.8064
F12	DMSO	21476.7	0.388924	38.8924
G1	Megestrol Acetate	17900	0.324154	32.4154
G2	Mercaptopurine	15814	0.286378	28.6378
G3	Streptozotocin (Zanosar)	25120	0.454902	45.4902
G4	Zoledronic Acid (Zoledronate)	28656	0.518936	51.8936
G5	Dexamethasone	27745	0.502439	50.2439
G6	Doxazosin mesylate	21187	0.383679	38.3679
G7	Etodolac (Lodine)	26975	0.488495	48.8495
G8	Etomidate	29658	0.537082	53.7082
G9	Fluconazole	30047	0.544126	54.4126
G10	Flumazenil	22098	0.400176	40.0176
G11	Fluoxetine HCl	19970	0.36164	36.164
G12	Curcumin	8237	0.149165	14.9165
H1	Gabapentin Hydrochloride	9905	0.179371	17.9371
H2	Gatifloxacin	12396	0.224481	22.4481
H3	Glimepiride	24896	0.450846	45.0846
H4	Granisetron HCl	27530	0.498545	49.8545
H5	No drug control	19730	0.357294	35.7294
H6	Ivermectin	9648	0.174717	17.4717
H7	Ketoconazole	19043	0.344853	34.4853
H8	Lansoprazole	24217	0.43855	43.855
H9	Lidocaine (Alphacaine)	17842	0.323104	32.3104
H10	Loratadine	12503	0.226419	22.6419
H11	Biapenem	19490	0.352948	35.2948
H12	Curcumin	8237	0.149165	14.9165
Layout
Plate 5	Compound	Luminescence signal	Fold Change	% Infection			DMSO			Stdev	%Stdev	Average	Fold Change	% Infection
A1	Daptomycin	7463	0.135149	13.5149			D12	10285	0.186253	0.0331038	3.31038	9780.33	1	100
A2	Doripenem Hydrate	8870	0.160628	16.0628			E12	7753	0.1404
A3	Dorzolamide HCL	8928	0.161679	16.1679			F12	11303	0.204688
A4	Gestodene	7894	0.142954	14.2954
A5	Drospirenone	8911	0.161371	16.1371
A6	Isotretinoin	14788	0.267798	26.7798
A7	Lopinavir (ABT-378)	8961	0.162276	16.2276
A8	Mianserin hydrochloride	11800	0.213688	21.3688
A9	Minoxidil	16212	0.293586	29.3586
A10	Omeprazole (Prilosec)	11858	0.214738	21.4738
A11	Resveratrol	11154	0.20199	20.199
A12	Mock	12081.3	0.218783	21.8783
B1	Rocuronium bromide	7827	0.14174	14.174
B2	Stavudine	7885	0.142791	14.2791
B3	Tenofovir (Viread)	8423	0.152533	15.2533
B4	Trilostane	9036	0.163634	16.3634
B5	Bimatoprost	12147	0.219972	21.9972
B6	Linezolid (Zyvox)	10790	0.195398	19.5398
B7	Alfuzosin hydrochloride (Uroxatral)	14093	0.255212	25.5212
B8	Clopidogrel (Plavix)	10418	0.188661	18.8661
B9	No drug control	14424	0.261207	26.1207
B10	Ranolazine dihydrochloride	13066	0.236614	23.6614
B11	Repaglinide	15193	0.275132	27.5132
B12	Mock	12081.3	0.218783	21.8783
C1	Risedronate sodium	14266	0.258345	25.8345
C2	No drug control	12934	0.234224	23.4224
C3	Sildenafil citrate	12702	0.230023	23.0023
C4	Sumatriptan succinate	17329	0.313814	31.3814
C5	No drug control	18157	0.328808	32.8808
C6	Topiramate	17072	0.30916	30.916
C7	Tranilast (SB 252218)	16063	0.290887	29.0887
C8	Venlafaxine	14357	0.259993	25.9993
C9	Voriconazole	16808	0.304379	30.4379
C10	Zileuton	17255	0.312474	31.2474
C11	Ziprasidone hydrochloride	9789	0.177271	17.7271
C12	Mock	12081.3	0.218783	21.8783
D1	Zonisamide	13513	0.244709	24.4709
D2	No drug control	10443	0.189114	18.9114
D3	Ofloxacin (Floxin)	15491	0.280529	28.0529
D4	No drug control	15640	0.283227	28.3227
D5	Moxifloxacin hydrochloride	16783	0.303926	30.3926
D6	No drug control	21253	0.384874	38.4874
D7	Iloperidone (Fanapt)	18223	0.330003	33.0003
D8	Fludarabine (Fludara)	15467	0.280094	28.0094
D9	Mycophenolate mofetil (CellCept)	3872	0.0701187	7.01187
D10	Dyphylline (Dilor)	15235	0.275893	27.5893
D11	Aztreonam (Azactam, Cayston)	11171	0.202297	20.2297
D12	DMSO	9780.33	0.177114	17.7114
E1	Perindopril Erbumine (Aceon)	15036	0.272289	27.2289
E2	Irbesartan (Avapro)	13712	0.248313	24.8313
E3	Norfloxacin (Norxacin)	13571	0.245759	24.5759
E4	Tadalafil (Cialis)	14929	0.270352	27.0352
E5	No drug control	13472	0.243967	24.3967
E6	Natamycin (Pimaricin)	21618	0.391484	39.1484
E7	Ibuprofen Lysine (NeoProfen)	18157	0.328808	32.8808
E8	No drug control	14780	0.267653	26.7653
E9	No drug control	14780	0.267653	26.7653
E10	Febuxostat (Uloric)	13108	0.237375	23.7375
E11	Nebivolol (Bystolic)	8936	0.161823	16.1823
E12	DMSO	9780.33	0.177114	17.7114
F1	Pimobendan (Vetmedin)	12669	0.229425	22.9425
F2	Tazarotene (Avage)	18314	0.331651	33.1651
F3	BIBR 953 (Dabigatran etexilate, Pradaxa)	15020	0.272	27.2
F4	BIBR-1048 (Dabigatran)	13786	0.249653	24.9653
F5	Artemether (SM-224)	10997	0.199146	19.9146
F6	No drug control	19655	0.355936	35.5936
F7	No drug control	17644	0.319518	31.9518
F8	No drug control	14465	0.261949	26.1949
F9	No drug control	15657	0.283535	28.3535
F10	No drug control	11949	0.216386	21.6386
F11	No drug control	10980	0.198839	19.8839
F12	DMSO	9780.33	0.177114	17.7114
G12	Curcumin	3863.5	0.0699647	6.99647
H12	Curcumin	3863.5	0.0699647	6.99647
Layout
Plate 6	Compound	Luminescence signal	Fold Change	% Infection			DMSO			Stdev	%Stdev	Average	Fold Change	% Infection
A1	Fenoprofen calcium	3814	0.0690683	6.90683			D12	14713	0.26644	0.0289916	2.89916	13916	1	100
A2	Erdosteine	8638	0.156427	15.6427			E12	14962	0.270949
A3	Adenine	12421	0.224934	22.4934			F12	12073	0.218632
A4	Adenine hydrochloride	8978	0.162584	16.2584
A5	Candesartan cilexetil (Atacand)	11833	0.214286	21.4286
A6	Aliskiren hemifumarate	8820	0.159723	15.9723
A7	Atazanavir sulfate	9077	0.164377	16.4377
A8	OSI-420 (Desmethyl Erlotinib)	5486	0.0993469	9.93469
A9	Irinotecan HCl Trihydrate (Campto)	12479	0.225984	22.5984
A10	Apatinib (YN968D1)	9143	0.165572	16.5572
A11	Eltrombopag (SB-497115-GR)	9590	0.173667	17.3667
A12	Mock	11380.3	0.206088	20.6088
B1	Esomeprazole sodium (Nexium)	7943	0.143841	14.3841
B2	Fesoterodine fumarate (Toviaz)	14010	0.253709	25.3709
B3	Abiraterone Acetate (CB7630)	10459	0.189404	18.9404
B4	Grape Seed Extract	12512	0.226582	22.6582
B5	No drug control	14664	0.265553	26.5553
B6	No drug control	13530	0.245017	24.5017
B7	No drug control	14208	0.257295	25.7295
B8	No drug control	13339	0.241558	24.1558
B9	No drug control	14424	0.261207	26.1207
B10	Itraconazole (Sporanox)	4948	0.0896041	8.96041
B11	Olanzapine (Zyprexa)	16402	0.297026	29.7026
B12	Mock	11380.3	0.206088	20.6088
C1	Ribavirin (Copegus)	11783	0.21338	21.338
C2	Scopolamine hydrobromide	12967	0.234822	23.4822
C3	Maprotiline hydrochloride	6834	0.123758	12.3758
C4	Naphazoline hydrochloride (Naphcon)	15707	0.284441	28.4441
C5	Epinephrine bitartrate (Adrenalinium)	18058	0.327015	32.7015
C6	L-Adrenaline (Epinephrine)	13695	0.248005	24.8005
C7	Phenytoin sodium (Dilantin)	14391	0.260609	26.0609
C8	Phenytoin (Lepitoin)	17072	0.30916	30.916
C9	Methacycline hydrochloride (Physiomycine)	16319	0.295523	29.5523
C10	Dopamine hydrochloride (Inotropin)	14473	0.262094	26.2094
C11	Ritodrine hydrochloride (Yutopar)	15044	0.272434	27.2434
C12	Mock	11380.3	0.206088	20.6088
D1	Econazole nitrate (Spectazole)	9739	0.176365	17.6365
D2	Miconazole (Monistat)	11369	0.205883	20.5883
D3	Lomefloxacin hydrochloride (Maxaquin)	14953	0.270786	27.0786
D4	Riboflavin (Vitamin B2)	14084	0.255049	25.5049
D5	Clomipramine hydrochloride (Anafranil)	16104	0.29163	29.163
D6	Cefprozil hydrate (Cefzil)	18430	0.333752	33.3752
D7	Tiotropium Bromide (Spiriva, BA 679BR)	22479	0.407076	40.7076
D8	Tiotropium Bromide hydrate	18240	0.330311	33.0311
D9	Trospium chloride (Sanctura)	19308	0.349652	34.9652
D10	Tolterodine tartrate (Detrol LA)	19780	0.358199	35.8199
D11	Azelastine hydrochloride (Astelin)	15243	0.276038	27.6038
D12	DMSO	13916	0.252007	25.2007
E1	5-Aminolevulinic acid hydrochloride	14887	0.269591	26.9591
E2	Clarithromycin (Biaxin, Klacid)	18000	0.325965	32.5965
E3	Rosiglitazone (Avandia)	19589	0.35474	35.474
E4	No drug control	16510	0.298982	29.8982
E5	Cortisone acetate (Cortone)	16327	0.295668	29.5668
E6	Clomifene citrate (Serophene)	14035	0.254162	25.4162
E7	Hydralazine hydrochloride	19655	0.355936	35.5936
E8	Cloxacillin sodium	19482	0.352803	35.2803
E9	Amoxicillin sodium (Amox)	18935	0.342897	34.2897
E10	Isoprenaline hydrochloride	14821	0.268396	26.8396
E11	Neomycin sulfate	16725	0.302876	30.2876
E12	DMSO	13916	0.252007	25.2007
F1	Prednisolone acetate (Omnipred)	13877	0.251301	25.1301
F2	No drug control	19068	0.345306	34.5306
F3	Tetracaine hydrochloride (Pontocaine)	16568	0.300033	30.0033
F4	Trazodone hydrochloride (Desyrel)	14275	0.258508	25.8508
F5	Tioxolone	18455	0.334205	33.4205
F6	Fluocinonide (Vanos)	17263	0.312618	31.2618
F7	Clorsulon	16443	0.297769	29.7769
F8	No drug control	16551	0.299725	29.9725
F9	No drug control	17784	0.322053	32.2053
F10	No drug control	15549	0.281579	28.1579
F11	No drug control	22810	0.41307	41.307
F12	DMSO	13916	0.252007	25.2007
G12	Curcumin	4480.5	0.0811381	8.11381
H12	Curcumin	4480.5	0.0811381	8.11381
